# Supplementary material
Source: publisher figshare collection journal article supplement (https://springernature.figshare.com/ndownloader/files/15247685)
Supplement: Supplementary file 1 [file 15247685]

**Suplementary File S1.**Primer sequence of the genes analyzed. Ubiquitin (Ubi), aquaporin (Pip), low-affinity nitrate transporter (Nrt2.1), high-affinity nitrate transporter (Nrt1.1), P-H+-ATPase (Mha1). F = Forward, R = Reverse.

| **Sequence name** | | **Sequence (5’ – 3’)** |
| --- | --- | --- |
| F/Ubi | 5'-GATACAGGACAAGGAGGGCATCCCG-3' | |
| R/Ubi | 5'-TCTGGATGTTGTAGTCGGCGAGGG-3' | |
| F/Pip 1 | 5’-GCATCAACCCGGCCAGGAGC-3’ | |
| R/Pip 1 | 5’-CGGCGCCGATGAATGGACCC-3’ | |
| F/Nrt2.1 | 5’-CCGTCGTCGCCATGGTGCTC-3’ | |
| R/Nrt2.1 | 5’-ATGATGCCGAGGGAGCGGCG-3’ | |
| F/Nrt1.1 | 5’-CGCCTCCCGGAACGACGGAA-3’ | |
| R/Nrt1.1 | 5’-CGGAGGATGGCGCTACAATGGC-3’ | |
| F/Mha1 | 5’-GGCCAACCTTGCTCCCAAAACCA-3’ | |
| R/Mha1 | 5’-CACCAGGAACCAAGATTGCAGCCTC-3’ | |
